# Supplementary material
Source: ML conference proceedings conference paper supplement (https://openaccess.thecvf.com/content/CVPR2026/html/Li_SpaceDrive_Infusing_Spatial_CVPR_2026_paper.html)
Supplement: Supplementary file 1 [file Li_SpaceDrive_Infusing_Spatial_CVPR_2026_supplemental.pdf]

# SpaceDrive: Infusing Spatial Awareness into VLM-based Autonomous Driving

## Supplementary Material

The main content of this supplementary material is organized as follows:

- Section A: More implementation details of our method;
- Section B: Additional experiments and ablation studies;
- Section C: Additional visualization comparisons and qualitative analysis.

### A. Additional Implementation Details

#### A.1. SpaceDrive Framework

To ensure seamless adaptability, our method avoids any model-specific customization and fully preserves the original image preprocessing, patchification strategy, text tokenization, and chat template used by each base VLM model. Given the shape of the preprocessed visual patches, the depth map is resized accordingly using min-pooling (*e.g.* patch shapes of  $6 \times 24 \times 24$  for LLaVA-1.5-7B [40] and  $6 \times 23 \times 23$  for Qwen2.5-VL-7B [2] in our configuration). For the coordinate parsing of the text inputs, We employ a strict regex rule matching the format “(X, Y)” or “(X, Y, Z)”. Substrings matching this pattern (*e.g.* “(7.5, -3.2)”) are extracted and extended as the 3D coordinates (*e.g.* (7.5, -3.2, 0)) and converted to 3D PE. Any numeric string failing this match (*e.g.* “3”) is treated as a standard textual token. This strict separation prevents ambiguity between spatial coordinates and general numerical values, ensuring that only spatial data triggers the PE en/decoding. Newly introduced tokens, such as ⟨IND⟩, are set as learnable and appended to the frozen input embedding layer and output language-model head. The PE decoder for coordinates is implemented as a standard two-layer MLP with the same hidden dimensionality as the base VLM. In all experiments, we set the seed to 888. The LoRA configurations are listed in Tab. A.

#### A.2. Training Details

**Open-loop Planning** For open-loop planning, we follow prior works and use 6 future trajectory points sampled at 2 Hz over a 3-second horizon as ground truth supervision. As emphasized in previous studies [36, 77], strong open-loop planning performance can be achieved using only ego-status. To rigorously validate the effectiveness of our framework, the standard SpaceDrive variant intentionally excludes motion dynamics and high-level driving commands (*e.g.* “go straight”, “turn right”) from its inputs. In this configuration, the model performs trajectory planning exclusively from image observations, enabling a clean evaluation of the spatial reasoning capability brought by our design. The variant SpaceDrive+ includes the current commands and ego dynamics of past 2 frames that are widely used in other

Table A. LoRA configurations for VLM fine-tuning.

| Setting | Rank ( $r$ ) | Alpha ( $\alpha$ ) | Dropout | Target Modules                 |
|---------|--------------|--------------------|---------|--------------------------------|
| Value   | 16           | 16                 | 0.05    | q_proj, k_proj, v_proj, o_proj |

Table B. Counterfactual reasoning comparison in the open-loop planning (without ego status). P and R here stand for Precision and Recall. Results are highlighted in **bold** and underline for the best and the second-best performance.

| Method            | Safe        |             | Red Light   |             | Collision   |             | Drivable Area |             |
|-------------------|-------------|-------------|-------------|-------------|-------------|-------------|---------------|-------------|
|                   | P           | R           | P           | R           | P           | R           | P             | R           |
| BEV-MLP           | 70.2        | 17.3        | 48.7        | 53.6        | 31.1        | 70.4        | 32.4          | 56.6        |
| Omni-L [63]       | <b>72.1</b> | <u>58.0</u> | <u>59.2</u> | <u>63.3</u> | <u>34.3</u> | <u>71.3</u> | <u>49.1</u>   | <b>59.2</b> |
| Omni-Q [63]       | <u>70.7</u> | 49.0        | 57.6        | 58.3        | 32.3        | <b>72.6</b> | 48.5          | <u>58.6</u> |
| SpaceDrive (ours) | 65.7        | <b>63.6</b> | <b>70.3</b> | <b>72.7</b> | <b>37.5</b> | 66.4        | <b>55.0</b>   | 37.0        |

works [12, 63].

For VQA training and evaluation, we adopt the dataset provided by OmniDrive [63], which includes scene description, attention, counterfactual reasoning, planning, as well as other general conversations. Consistent with the implementation of OmniDrive, the other VQA tasks are appended subsequent to the trajectory planning task to ensure semantic stability.

**Closed-loop Planning** Inspired by SimLingo [49], we augment the supervision of 6 trajectory points with 20 additional path waypoints, uniformly spaced at 1-meter intervals. In this setup, the trajectory points serve two purposes: estimating the target speed and identifying the appropriate waypoint for the target direction. This leads to generally more stable steering regardless of whether the ego vehicle is moving or not. Two PID controllers are applied to determine acceleration and steering, respectively. During training, we use a subset of SimLingo routes containing 3600 episodes with PDM-lite as the expert driver.

#### A.3. Learnable Parameter Convergence

We report that the learnable norm factor  $\alpha_{PE}$  (initialized at 0.1) generally converges to the range of [0.085, 0.11] across different backbones and settings. For instance, in the default open-loop QwenVL-based setting, it stabilizes at 0.087.

### B. Additional Experiments and Analyses

#### B.1. VQA for Counterfactual Reasoning

As aforementioned, to validate the spatial reasoning capabilities of SpaceDrive, we conduct counterfactual reasoning experiments following the setting in OmniDrive [63], as presented in Tab. B. In this evaluation, keywords such as

Table C. Ablation of depth estimator.

| $f_{dep.}$           | Avg. L2 ↓ | Avg. Collision ↓ | Avg. Intersection ↓ |
|----------------------|-----------|------------------|---------------------|
| DepthAnythingV2 [71] | 1.76      | 1.95             | 3.96                |
| UniDepthV2 [48]      | 1.80      | 1.88             | 4.21                |

Table D. Ablation of pooling strategy.

| Pooling Strategy | Avg. L2 ↓ | Avg. Collision ↓ | Avg. Intersection ↓ |
|------------------|-----------|------------------|---------------------|
| Min              | 1.80      | 1.88             | 4.21                |
| Average          | 1.83      | 1.88             | 4.08                |
| Median           | 1.83      | 2.17             | 4.64                |

“safety”, “collision”, “running a red light”, and “out of the drivable area” are extracted from the VQA outputs and compared against ground truth keywords to compute Precision and Recall. The results demonstrate that our framework achieves superior performance across the majority of metrics, *e.g.* a Recall of 63.6% in the safety task. It is particularly noteworthy that, without any specific prompt engineering for the dialogue, the mere incorporation of the unified 3D spatial representation enables significantly higher Precision in tasks demanding rigorous spatial understanding, such as Collision (37.5%) and Drivable Area (55.0%). This further confirms our SpaceDrive possesses strong spatial reasoning capabilities.

## B.2. More Ablation Studies

**Depth Estimator** In Tab. C, we compare the influence of different pre-trained depth estimator on the planning performance. DepthAnythingV2 [71] and UniDepthV2 [48] are selected as representative examples of relative and metric depth estimation models, respectively. We observe that both variants perform similarly on the L2 error metric and Collision rate, which are the most reliable indicator of planning performance. This suggests that the effectiveness of our SpaceDrive is independent of a specific pre-trained depth model, implicitly demonstrating the adaptability of our framework. Notably, LiDAR-based depth ground truth (GT) is inherently sparse and lacks valid depth values in regions such as the sky, necessitating manual definition. Together with factors like camera distortion and projection error, GT-based comparisons are unreliable and thus excluded from the comparison.

**Depth Pooling Strategy** Min pooling in our default setting may be sensitive to outliers, yet the compact patch resolution renders such artifacts empirically rare. In fact, every pooling strategy has its inherent limitations: average pooling blurs object boundaries, while median pooling induces intra-object depth discontinuities of adjacent patches. In contrast, min-depth is relatively reliable and safety-critical as it preserves the closest obstacles. Tab. D validates that min pooling yields the lowest L2 error and collision rate.

Table E. Ablation of LoRA rank. Learn. Par. is the abbreviation for the number of LoRA parameters when selecting Qwen2.5-VL-7B as the base VLM.

| Rank | Learn. Par. | Avg. L2 ↓ | Avg. Collision ↓ | Avg. Intersection ↓ |
|------|-------------|-----------|------------------|---------------------|
| 16   | 10.09M      | 1.80      | 1.88             | 4.21                |
| 64   | 40.37M      | 1.88      | 2.13             | 4.08                |
| 128  | 80.74M      | 1.82      | 2.25             | 4.68                |

Table F. Ablation of PE frequency.

| Frequency         | Avg. L2 ↓ | Avg. Collision ↓ | Avg. Intersection ↓ |
|-------------------|-----------|------------------|---------------------|
| $1000^{-2i/d_a}$  | 1.78      | 2.01             | 3.93                |
| $10000^{-2i/d_a}$ | 1.83      | 1.83             | 3.18                |
| $20000^{-2i/d_a}$ | 1.80      | 1.88             | 4.21                |

**LoRA Rank** Table E presents a comparison of different LoRA [17] ranks in the VLM during fine-tuning. Benefiting from our universal spatial positional encoding, the coordinate regression process in the language model is simplified. Utilizing only low-rank fine-tuning (rank 16) achieves the optimal overall result (L2 error of 1.80, Collision rate of 1.88%, and Intersection rate of 4.21%). While increasing the rank to 128 substantially raises the number of learnable parameters from 10.09M to 80.74M, it fails to improve the planning accuracy and, instead, leads to a degradation in Collision and Intersection rates. We attribute this to the excessive degrees of training freedom in the high-rank adapter, which hinders the convergence. The above comparison further demonstrates that our method not only offers stronger planning reliability but also maintains parameter efficiency.

**PE Frequency** Table F investigates the base frequency of the Sin-Cos PE, which impacts both encoding resolution and smoothness. Utilizing a smaller frequency base (corresponding to a higher frequency) introduces a larger phase shift between adjacent positions but leads to positional aliasing at long distances, thereby inhibiting the representation of far-field positions. As shown in the comparison, setting the base to 1000 enhances local resolution and achieves the lowest L2 error of 1.78. However, distant coordinates exhibit near-random phase characteristics, which compromises overall safety (leading to worse Collision and Intersection rates). Conversely, an excessively large base (*e.g.* 20000) generates smoother, more stable encodings over long distances but diminishes local discriminative capability. Compared to the original base of 10000, the resulting L2 error reduction is less pronounced, at only  $-0.03$ , but the collision rate increase is negligible. Overall, comparing all variants reveals that the influence of different PE frequencies is relatively limited and non-decisive. We finally adopt 20000 as our PE frequency base.

**Regression Loss** In Tab. G, we compares different regression losses for trajectory prediction. MAE provides robustness to

Table G. Ablation of regression loss.

| $\mathcal{L}_{\text{reg.}}$ | Avg. L2 ↓ | Avg. Collision ↓ | Avg. Intersection ↓ |
|-----------------------------|-----------|------------------|---------------------|
| MAE                         | 1.86      | 1.82             | 5.73                |
| MSE                         | 1.82      | 2.14             | 6.22                |
| Huber Loss                  | 1.80      | 1.88             | 4.21                |

Table H. Robustness to Depth Estimation Errors.

| Depth Noise          |                       | Avg. L2 ↓ | Avg. Collision ↓ | Avg. Intersection ↓ |
|----------------------|-----------------------|-----------|------------------|---------------------|
| Training & Inference | w. -5% Global Shift   | 1.86      | 1.80             | 5.22                |
|                      | w. 5% Global Shift    | 1.86      | 1.93             | 4.41                |
|                      | w. 5% Random Noise    | 1.83      | 2.16             | 4.44                |
| Inference only       | w. -2.5% Global Shift | 1.80      | 1.89             | 4.22                |
|                      | w. 2.5% Global Shift  | 1.80      | 1.86             | 4.24                |
|                      | w. 2.5% Random Noise  | 1.80      | 1.89             | 4.17                |

outliers but yields the worst L2 and intersection metrics, suggesting insufficient pressure on medium-scale errors. MSE reduces L2 compared to MAE, but its quadratic growth on large residuals makes optimization more sensitive to outliers, leading to noticeably higher collision and intersection rates. Huber loss strikes a balance between them and achieves the best L2 error together with markedly improved safety metrics. So we adopt Huber loss as our final regression objective.

### B.3. Robustness to Depth Estimation Errors

We present experiments when injecting relative depth noise ( $\pm 5\%$  Global Shift or 5% Random Noise) in inference or training & inference. As shown in Tab. H, injecting noise *during inference* results in negligible performance drop (e.g. Avg. L2 remains 1.80). This confirms that SpaceDrive is robust to depth inaccuracies. It relies on 3D spatial structure rather than precise metric depth, allowing VLM’s semantic understanding to compensate for noise. Conversely, noise injection *during training* slightly degrades performance. This verifies that depth information is actively utilized in training, but the learned policy generalizes well against test-time perturbations. In summary, SpaceDrive treats depth as a geometric guide for attention, not strong geometric priors.

### B.4. Comprehensive Benchmark

Constrained by the limited space in the main paper, we list only the primary relevant works in the benchmark comparisons. Therefore, we provide more comprehensive benchmark comparisons for open-loop and closed-loop planning in Tab. I and Tab. J, respectively. It is worth noting that existing nuScenes [4] open-loop evaluations utilize differing sets of metrics in different studies. While the main paper employs the OmniDrive [63] version commonly used by VLM-based frameworks, Table I provides results derived using the evaluation metrics from ST-P3 [18] and UniAD [19].

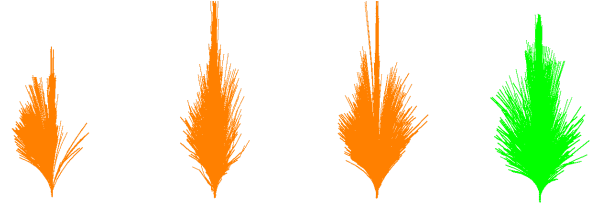

(a) OmniDrive-L (b) SpaceDrive (c) SpaceDrive-CoT (d) Ground Truth

Figure A. Trajectory distribution of open-loop planning for different frameworks and ground truth.

## C. Additional Visualization

### C.1. More Adaptability Analysis

Figure A illustrates the distribution of planned trajectories across all scenarios under the open-loop setting of nuScenes [4]. We first analyze the output trajectory distribution of OmniDrive-L [63], a typical scheme utilizing textual digit tokens for waypoint coordinates, shown in Fig. A.a. Due to the VLM’s limitations in numerical processing, as discussed in Section 1, OmniDrive-L exhibits clear mode collapse for right-turn cases. In sharp contrast, our SpaceDrive, which is based on the universal 3D PE representation, significantly mitigates this issue, as shown in Fig. A.b. Furthermore, when adopting inference techniques such as Chain-of-Thought during inference, the output trajectory planning demonstrates enhanced robustness (Fig. A.c) and closer alignment with the ground truth distribution (Fig. A.d). This result further supports the strong adaptability of our method to language model inference techniques.

### C.2. Failure Analysis of Textual Coordinate Output

A further quantitative analysis is conducted to assess the driving capability of conventional VLM-based models that output trajectory coordinates as textual digit tokens in closed-loop simulation, as shown in Fig. B. We use the exact same scenario as in Fig. 3 and employ OmniDrive-L [63], a framework structurally analogous to SpaceDrive, utilizing the same closed-loop training configuration as in Sec. A.2. This figure clearly illustrates that in the closed-loop setting, the planned trajectories generated by OmniDrive-L collapse into an approximately straight line, and the directional control exhibits random oscillation. This phenomenon aligns with the mode collapse previously observed during open-loop evaluation (See Sec. C.1). Critically, this oscillation is amplified over time, leading to vehicle instability and ultimately making the vehicle veer off the road and collide with the guardrail. This result provides strong empirical support for our analysis in Sec. 4.2: purely text-based trajectory coordinate output from VLMs is inadequate for reliable closed-loop driving.

Table I. **Open-loop planning results on nuScenes [4]**. SpaceDrive+ denotes the adoption of the ego planner input. ‡: The model is trained using only the trajectory prediction task for open-loop planning, without utilizing our generated OmniDrive Q&A data. Methods marked as Hybrid Paradigm here stack traditional and VLM-based approaches, and are thus incomparable. Results are highlighted in **bold** and underline for the best and the second-best performance among VLM-based methods.

| Method                              | Ego Status |         | ST-P3 Metrics |             |             |                 |             |             |             |             | UniAD Metrics |             |                 |             |             |             |             |             |
|-------------------------------------|------------|---------|---------------|-------------|-------------|-----------------|-------------|-------------|-------------|-------------|---------------|-------------|-----------------|-------------|-------------|-------------|-------------|-------------|
|                                     | BEV        | Planner | L2 (m) ↓      |             |             | Collision (%) ↓ |             |             |             | L2 (m) ↓    |               |             | Collision (%) ↓ |             |             |             |             |             |
|                                     |            |         | 1s            | 2s          | 3s          | Avg.            | 1s          | 2s          | 3s          | Avg.        | 1s            | 2s          | 3s              | Avg.        | 1s          | 2s          | 3s          | Avg.        |
| <i>Traditional Modular Paradigm</i> |            |         |               |             |             |                 |             |             |             |             |               |             |                 |             |             |             |             |             |
| ST-P3 [18]                          | -          | -       | 1.33          | 2.11        | 2.90        | 2.11            | 0.23        | 0.62        | 1.27        | 0.71        | 1.72          | 3.26        | 4.86            | 3.28        | 0.44        | 1.08        | 3.01        | 1.51        |
| UniAD [19]                          | -          | -       | 0.44          | 0.67        | 0.96        | 0.69            | 0.04        | 0.08        | 0.23        | 0.12        | 0.48          | 0.96        | 1.65            | 1.03        | 0.05        | 0.17        | 0.71        | 0.31        |
| VAD-Base [27]                       | -          | -       | 0.41          | 0.70        | 1.05        | 0.72            | 0.07        | 0.17        | 0.41        | 0.22        | 0.54          | 1.15        | 1.98            | 1.22        | 0.10        | 0.24        | 0.96        | 0.43        |
| UAD [14]                            | -          | -       | 0.28          | 0.41        | 0.65        | 0.45            | 0.01        | 0.03        | 0.14        | 0.06        | 0.39          | 0.80        | 1.50            | 0.90        | 0.01        | 0.12        | 0.43        | 0.19        |
| MomAD [56]                          | -          | -       | 0.28          | 0.49        | 0.78        | 0.52            | 0.08        | 0.14        | 0.34        | 0.19        | 0.36          | 0.83        | 1.56            | 0.91        | 0.06        | 0.23        | 1.00        | 0.43        |
| GenAD [83]                          | -          | ✓       | 0.31          | 0.57        | 0.91        | 0.60            | 0.01        | 0.05        | 0.22        | 0.09        | 0.43          | 0.88        | 1.62            | 0.98        | 0.06        | 0.16        | 0.68        | 0.30        |
| Drive-WM [64]                       | ✓          | ✓       | 0.43          | 0.77        | 1.20        | 0.80            | 0.10        | 0.21        | 0.48        | 0.26        | -             | -           | -               | -           | -           | -           | -           | -           |
| SparseDrive [58]                    | -          | ✓       | 0.29          | 0.55        | 0.91        | 0.58            | 0.01        | 0.02        | 0.13        | 0.06        | 0.44          | 0.92        | 1.69            | 1.01        | 0.07        | 0.19        | 0.71        | 0.32        |
| DiffusionDrive [38]                 | -          | ✓       | 0.27          | 0.54        | 0.90        | 0.57            | 0.03        | 0.05        | 0.16        | 0.08        | -             | -           | -               | -           | -           | -           | -           | -           |
| <i>VLM-based Paradigm</i>           |            |         |               |             |             |                 |             |             |             |             |               |             |                 |             |             |             |             |             |
| EMMA [22]                           | -          | -       | <b>0.14</b>   | <b>0.29</b> | <u>0.54</u> | <b>0.32</b>     | -           | -           | -           | -           | -             | -           | -               | -           | -           | -           | -           | -           |
| RDA-Driver [21]                     | ✓          | ✓       | 0.17          | 0.37        | 0.69        | 0.40            | <b>0.01</b> | <b>0.05</b> | <u>0.26</u> | <b>0.10</b> | <u>0.23</u>   | <u>0.73</u> | <u>1.54</u>     | <u>0.80</u> | <b>0.00</b> | <b>0.13</b> | <u>0.83</u> | <b>0.32</b> |
| DriveVLM [60]                       | -          | ✓       | 0.18          | 0.34        | 0.68        | 0.40            | -           | -           | -           | -           | -             | -           | -               | -           | -           | -           | -           | -           |
| ORION [12]                          | ✓          | -       | 0.17          | <u>0.31</u> | 0.55        | 0.34            | -           | -           | -           | -           | -             | -           | -               | -           | -           | -           | -           | -           |
| OmniDrive-Q [63]                    | -          | -       | 1.15          | 1.96        | 2.84        | 1.98            | -           | -           | -           | -           | -             | -           | -               | -           | -           | -           | -           | -           |
| OmniDrive-Q++ [63]                  | ✓          | ✓       | <b>0.14</b>   | <b>0.29</b> | 0.55        | <u>0.33</u>     | -           | -           | -           | -           | -             | -           | -               | -           | -           | -           | -           | -           |
| OmniDrive-L† [63]                   | -          | -       | 1.47          | 2.43        | 3.38        | 2.43            | -           | -           | -           | -           | -             | -           | -               | -           | -           | -           | -           | -           |
| OmniDrive-L++‡ [63]                 | -          | ✓       | 0.31          | 0.62        | 1.06        | 0.66            | -           | -           | -           | -           | -             | -           | -               | -           | -           | -           | -           | -           |
| OmniDrive-L [63]                    | -          | -       | 1.43          | 2.34        | 3.24        | 2.34            | -           | -           | -           | -           | -             | -           | -               | -           | -           | -           | -           | -           |
| OmniDrive-L++ [63]                  | -          | ✓       | <u>0.15</u>   | 0.36        | 0.70        | 0.40            | -           | -           | -           | -           | -             | -           | -               | -           | -           | -           | -           | -           |
| SpaceDrive (ours)                   | -          | -       | 1.06          | 1.79        | 2.55        | 1.80            | 0.35        | 0.61        | 1.31        | <u>0.76</u> | 1.41          | 2.88        | 4.51            | 2.93        | 0.59        | 1.72        | 4.53        | 2.28        |
| SpaceDrive+ (ours)                  | -          | ✓       | <u>0.15</u>   | <b>0.29</b> | <b>0.51</b> | <b>0.32</b>     | <u>0.05</u> | <u>0.08</u> | <b>0.16</b> | <b>0.10</b> | <b>0.20</b>   | <b>0.53</b> | <b>1.13</b>     | <b>0.62</b> | <u>0.10</u> | <u>0.31</u> | <b>0.80</b> | <u>0.40</u> |
| <i>Hybrid Paradigm</i>              |            |         |               |             |             |                 |             |             |             |             |               |             |                 |             |             |             |             |             |
| VLP [46]                            | ✓          | -       | 0.30          | 0.53        | 0.84        | 0.55            | 0.01        | 0.07        | 0.38        | 0.15        | 0.36          | 0.68        | 1.19            | 0.74        | 0.03        | 0.12        | 0.32        | 0.16        |
| ReAL-AD [44]                        | ✓          | -       | 0.30          | 0.48        | 0.67        | 0.48            | 0.07        | 0.10        | 0.28        | 0.15        | 0.40          | 0.71        | 1.14            | 0.77        | 0.02        | 0.12        | 0.37        | 0.17        |
| DriveVLM-Dual [60]                  | ✓          | -       | 0.15          | 0.29        | 0.48        | 0.31            | 0.05        | 0.08        | 0.17        | 0.10        | -             | -           | -               | -           | -           | -           | -           | -           |
| SOLVE-VLM [8]                       | ✓          | -       | 0.13          | 0.25        | 0.47        | 0.28            | -           | -           | -           | -           | -             | -           | -               | -           | -           | -           | -           | -           |
| Senna [28]                          | ✓          | -       | 0.11          | 0.21        | 0.35        | 0.22            | 0.04        | 0.08        | 0.13        | 0.08        | -             | -           | -               | -           | -           | -           | -           | -           |

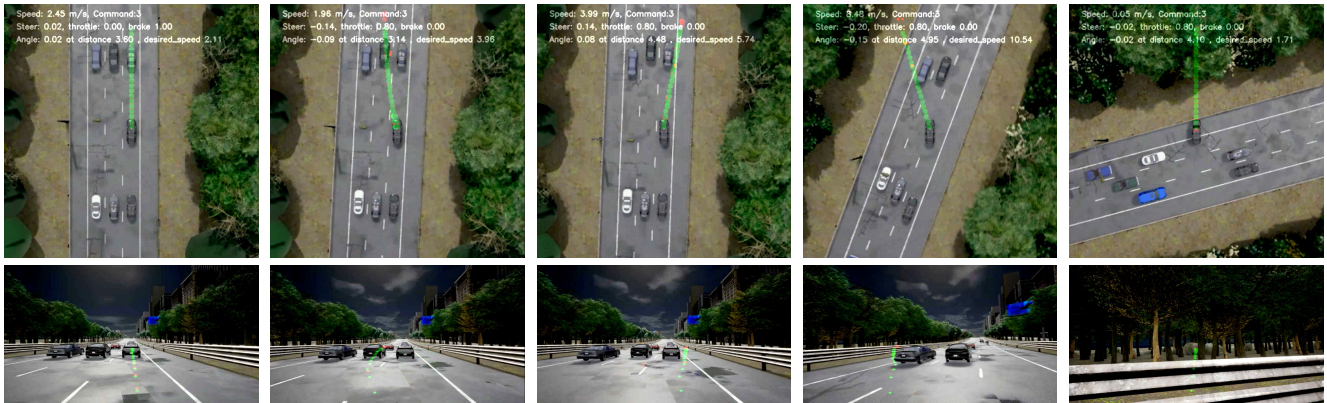

Figure B. **Qualitative results of OmniDrive-L [63] in closed-loop setting on Bench2Drive [25]**. Green and pink dots represent path and speed waypoints, respectively. Parameters such as speed and steering wheel angle can be found in the figures.

### C.3. More Qualitative Closed-Loop Results

We present additional closed-loop simulation visualizations for SpaceDrive in Fig. C, covering 3 representative safety-critical scenarios: (a) navigating around a construction zone

requiring a brief excursion into the oncoming lane; (b) decelerating and yielding due to a sudden pedestrian crossing during normal driving; and (c) performing an emergency stop and yielding to an ambulance rapidly approaching from

- (a) Navigate around the construction roadblock

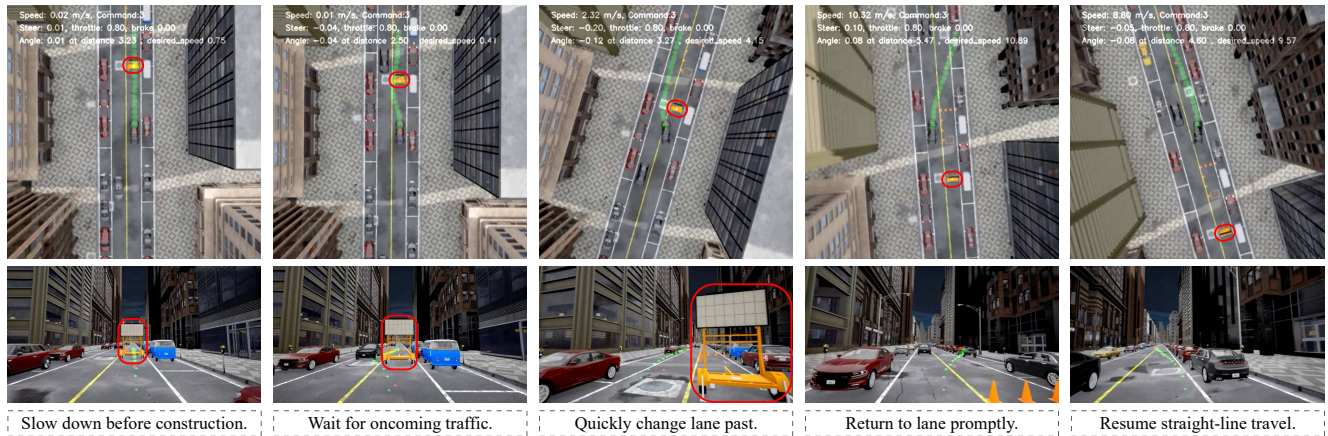

- (b) Yield to the sudden appearance and road crossing

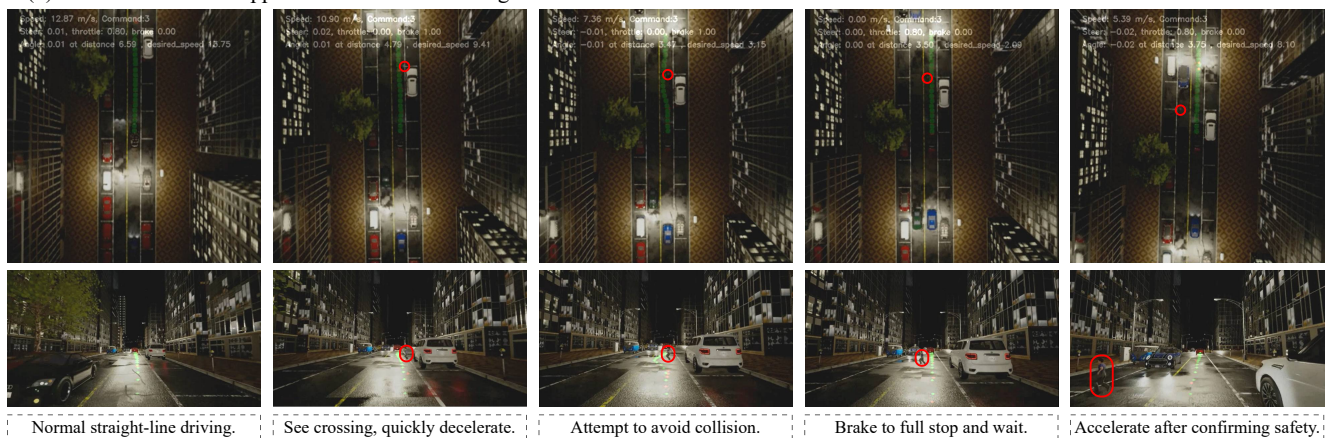

- (c) Yield to the ambulance coming from behind

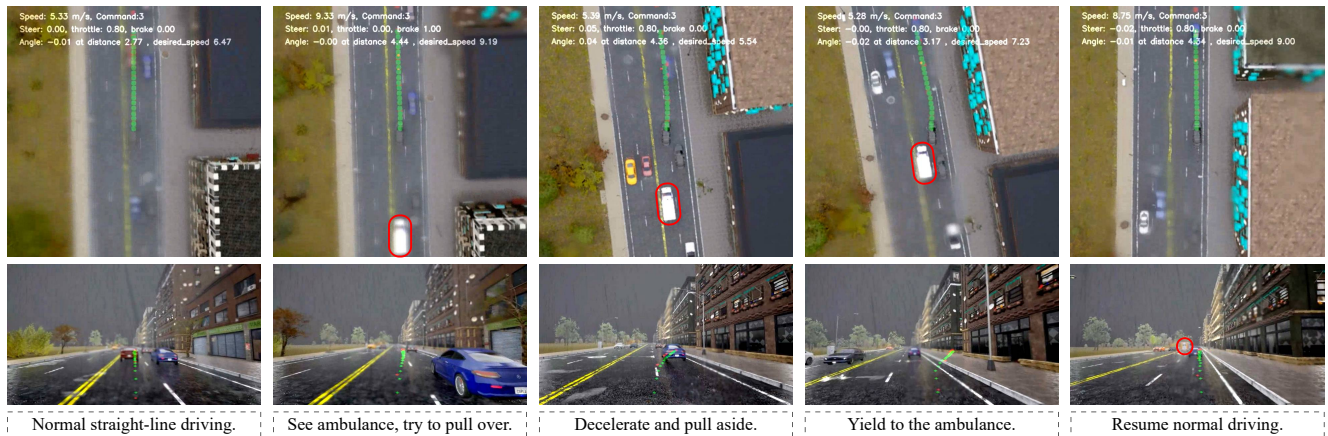

Figure C. **More qualitative results of closed-loop evaluation on Bench2Drive [25].** We include 3 scenarios here to demonstrate the closed-loop planning capability of SpaceDrive: (a) urban road construction; (b) a sudden pedestrian crossing; (c) yielding to an ambulance. **Green** and **pink** dots represent path and speed waypoints, respectively. **Red circles** indicate objects requiring attention in the scenario. Parameters such as speed and steering wheel angle can be found in the figures.

the rear. All these scenarios demand the model to quickly establish a deep understanding of the 3D spatial context and

generate a sound trajectory in a minimal timeframe. The visualizations clearly indicate that our proposed framework, by

Table J. **Closed-loop planning results on Bench2Drive [25]**. Results are highlighted in **bold** and underline for the best and the second-best performance among VLM-based methods.

| Method                              | Closed-loop Metric       |                            |
|-------------------------------------|--------------------------|----------------------------|
|                                     | Driving Score $\uparrow$ | Success Rate(%) $\uparrow$ |
| <i>Traditional Modular Paradigm</i> |                          |                            |
| AD-MLP [77]                         | 18.05                    | 0.00                       |
| UniAD-Base [19]                     | 45.81                    | 16.36                      |
| VAD-Base [27]                       | 42.35                    | 15.00                      |
| MomAD [56]                          | 44.54                    | 16.71                      |
| GenAD [83]                          | 44.81                    | 15.90                      |
| SparseDrive [58]                    | 47.38                    | 17.72                      |
| UAD [14]                            | 49.22                    | 20.45                      |
| SeerDrive [78]                      | 58.32                    | 30.17                      |
| WoTE [33]                           | 61.71                    | 31.36                      |
| DriveDPO [50]                       | 62.02                    | 30.62                      |
| ThinkTwice [24]                     | 62.44                    | 37.17                      |
| DriveTransformer-L [26]             | 63.46                    | 38.60                      |
| DriveAdapter [23]                   | 64.22                    | 42.08                      |
| GEMINUS [61]                        | 65.39                    | 37.73                      |
| Raw2Drive [73]                      | 71.36                    | 50.24                      |
| Hydra-NeXt [37]                     | 73.86                    | 53.22                      |
| DiffusionDrive [38]                 | 77.68                    | 52.72                      |
| PGS [20]                            | 78.08                    | 48.64                      |
| GaussianFusion [42]                 | 79.10                    | 54.40                      |
| TF++ [87]                           | 84.21                    | 64.39                      |
| R2SE [41]                           | 86.28                    | 67.76                      |
| HiP-AD [59]                         | 86.77                    | 69.09                      |
| <i>VLM-based Paradigm</i>           |                          |                            |
| ReAL-AD [44]                        | 41.17                    | 11.36                      |
| Dual-AEB [80]                       | 45.23                    | 10.00                      |
| X-Driver [43]                       | 51.70                    | 18.10                      |
| VDRive [15]                         | 66.25                    | 50.51                      |
| StuckSolver [3]                     | 70.89                    | 50.01                      |
| DriveMoE [72]                       | 74.22                    | 48.64                      |
| ETA [16]                            | 74.33                    | 48.33                      |
| VLR-Drive [30]                      | 75.01                    | 50.00                      |
| ORION [12]                          | 77.74                    | 54.62                      |
| SimLingo [49]                       | <b>85.07</b>             | <b>67.27</b>               |
| SpaceDrive+ ( <b>ours</b> )         | <u>78.02</u>             | <u>55.11</u>               |

leveraging its unified 3D representation, effectively manages these critical, unforeseen situations. This further substantiates the efficacy of our proposed SpaceDrive framework.
